# Supplementary material
Source: publisher figshare collection journal article supplement (https://tandf.figshare.com/ndownloader/files/21727614)

**Supporting Information**

Decarboxylation of Indole-3-carboxylic Acids under Metal-free Conditions

Xia Chen and Xiao-Yu Zhou*

School of Chemistry and Materials Engineering, Liupanshui Normal University, Liupanshui, 553004, China

Zhouxiaoyu20062006@126.com (X.-Y. Zhou)

**Table of Contents**

**1. General and Materials………………………………………………………..……..…S1**

**2. The Typical Procedure for the Decarboxylation of Indole-3-carboxylic Acids…… S1-4**

**3. References………………………………………………………………………………S4**

**4. Copy of NMR for Indoles……………………………………………...…............…….S5-16**

**1. General and Materials.**

**General:** The chemical shifts for 1H NMR were recorded in ppm downfield from tetramethylsilane (TMS) with the solvent resonance as the internal standard. The chemical shifts for 13C NMR were recorded in ppm downfield using the central peak of d-dimethyl sulfoxide (39.6 ppm) or d-chloroform (77.23 ppm) as the internal standard. Coupling constants (*J*) are reported in Hz and refer to apparent peak multiplications. Flash column chromatography was performed on silica gel (200-300 mesh). TLC analysis was performed using glass-backed plates coated with 0.2 mm silica.

**Materials:** All commercially available reagents were used without further purification. The starting materials **1a-1n** are commercially available.

**2. The Typical Procedure for the Decarboxylation of Indole-3-carboxylic Acids**

**Procedure A**: A mixture of indole-3-carboxylic acid **1** (0.50 mmol) and K2CO3 (13.8 mg, 0.10 mmol, 20 mol%) in EtOH (3 mL) was added into a Schlenk flask (25 mL) and stirred at 140 °C. The reaction was monitored by thin layer chromatography until the disappearance of starting material **1**. Then the solvent was evaporated under reduced pressure and the residue was purified by column chromatography (petroleum ether/ethyl acetate 20:1 to 10:1).

**Procedure B**: A mixture of indole-3-carboxylic acid **1** (0.50 mmol) in CH3CN (3 mL) was added into a Schlenk flask (25 mL) and stirred at 140 °C. The reaction was monitored by thin layer chromatography until the disappearance of starting material **1**. Then the solvent was evaporated under reduced pressure and the residue was purified by column chromatography (petroleum ether/ethyl acetate 20:1 to 10:1).

**1*H*-indole (2a)**[1]

Yield **A**: > 99%, 59.0 mg; Yield **B**: > 99%, 59.0 mg. White solid, mp 50-52 °C, Rf 0.51 (Hexane/EtOAc, 10:1). 1H NMR (600 MHz, CDCl3) *δ* 8.08 (s, 1H), 7.74 (d, *J* = 7.9 Hz, 1H), 7.43 (dd, *J* = 8.1, 0.6 Hz, 1H), 7.31-7.26 (m, 1H), 7.24-7.19 (m, 2H), 6.64 (t, *J* = 2.1 Hz, 1H); 13C NMR (151 MHz, CDCl3) *δ* 135.8, 127.9, 124.2, 122.0, 120.8, 119.9, 111.1, 102.6.

**2-methyl-1*H*-indole (2b)** [1]

Yield **A**: 95%, 62.0 mg; Yield **B**: 89%, 58.4 mg. White solid, mp 53-55 °C, Rf 0.51 (Hexane/EtOAc, 10:1). 1H NMR (600 MHz, CDCl3) *δ* 7.71 (s, 1H), 7.57-7.46 (m, 1H), 7.24 (d, *J* = 7.9 Hz, 1H), 7.17-7.01 (m, 2H), 6.22 (s, 1H), 2.40 (s, 3H); 13C NMR (151 MHz, CDCl3) *δ* 136.1, 135.1, 129.1, 121.0, 119.7, 110.3, 100.4, 13.7.

**2-phenyl-1*H*-indole (2c)** [1]

Yield **A**: 91%, 87.5 mg; Yield **B**: 98%, 94.5 mg. White solid, mp 183-185 °C, Rf 0.53 (Hexane/EtOAc, 10:1). 1H NMR (600 MHz, CDCl3) *δ* 8.35 (s, 1H), 7.70 (dd, *J* = 8.2, 1.3 Hz, 3H), 7.49 (t, *J* = 7.8 Hz, 2H), 7.44 (dd, *J* = 8.0, 0.4 Hz, 1H), 7.38 (t, *J* = 7.4 Hz, 1H), 7.27-7.24 (m, 1H), 7.21-7.17 (m, 1H), 6.88 (d, *J* = 1.4 Hz, 1H); 13C NMR (151 MHz, CDCl3) *δ* 138.0, 136.9, 132.4, 129.3, 129.1, 127.8, 125.2, 122.4, 120.7, 120.3, 111.0, 100.0.

**1*H*-indole-4-carbonitrile (2d)** [2]

Yield **A**: > 99%, 73.0 mg; Yield **B**: 97%, 69.2 mg. White solid, mp 119-121 °C, Rf 0.42 (Hexane/EtOAc, 10:1). 1H NMR (600 MHz, CDCl3) *δ* 8.82 (s, 1H), 7.69 (d, *J* = 8.2 Hz, 1H), 7.51 (d, *J* = 7.4 Hz, 1H), 7.44 (t, *J* = 2.8 Hz, 1H), 7.26 (t, *J* = 7.8 Hz, 1H), 6.79 (s, 1H); 13C NMR (151 MHz, CDCl3) *δ* 135.6, 129.3, 127.2, 125.4, 121.6, 119.1, 116.2, 102.7, 101.5.

**5-methyl-1*H*-indole (2e)** [1]

Yield **A**: 97%, 63.6 mg; Yield **B**: > 99%, 65.5 mg. White solid, mp 63-65 °C, Rf 0.51 (Hexane/EtOAc, 10:1). 1H NMR (600 MHz, CDCl3) *δ* 7.87 (s, 1H), 7.42 (s, 1H), 7.22 (d, *J* = 8.3 Hz, 1H), 7.08 (t, *J* = 2.8 Hz, 1H), 7.01 (dd, *J* = 8.3, 1.0 Hz, 1H), 6.45 (t, *J* = 2.1 Hz, 1H), 2.44 (s, 3H); 13C NMR (151 MHz, CDCl3) *δ* 134.2, 129.1, 128.2, 124.4, 123.7, 120.4, 110.8, 102.1, 21.5.

**5-methoxy-1*H*-indole (2f)** [1]

Yield **A**: > 99%, 74.0 mg; Yield **B**: > 99%, 73.2 mg. White solid, mp 56-58 °C, Rf 0.47 (Hexane/EtOAc, 10:1). 1H NMR (600 MHz, CDCl3) *δ* 8.11 (s, 1H), 7.30 (d, *J* = 8.6 Hz, 1H), 7.19 (s, 2H), 6.95 (d, *J* = 8.6 Hz, 1H), 6.55 (s, 1H), 3.92 (s, 3H); 13C NMR (151 MHz, CDCl3) *δ* 154.2, 131.1, 128.3, 125.1, 112.4, 111.9, 102.4, 102.3, 55.9.

**5-(benzyloxy)-1*H*-indole (2g)** [3]

Yield **A**: 96%, 107.0 mg; Yield **B**: > 99%, 111.9 mg. White solid, mp 108-110 °C, Rf 0.45 (Hexane/EtOAc, 10:1). 1H NMR (600 MHz, CDCl3) *δ* 7.99 (s, 1H), 7.47 (d, *J* = 7.4 Hz, 2H), 7.37 (t, *J* = 7.5 Hz, 2H), 7.31 (t, *J* = 7.3 Hz, 1H), 7.24 (t, *J* = 7.5 Hz, 1H), 7.17 (t, *J* = 4.4 Hz, 1H), 7.11 (t, *J* = 2.7 Hz, 1H), 6.93 (dd, *J* = 8.8, 2.3 Hz, 1H), 6.50-6.40 (m, 1H), 5.09 (s, 2H); 13C NMR (151 MHz, CDCl3) *δ* 153.4, 137.8, 131.2, 129.1, 128.6, 128.3, 127.9, 127.7, 125.4, 125.0, 113.1, 111.8, 104.0, 102.5, 71.0.

**1*H*-indole-5-carbonitrile (2h)** [2]

Yield **A**: > 99%, 71.5 mg; Yield **B**: 99%, 70.2 mg. White solid, mp 103-105 °C, Rf 0.39 (Hexane/EtOAc, 10:1). 1H NMR (600 MHz, CDCl3) *δ* 8.90 (s, 1H), 8.02 (s, 1H), 7.55-7.35 (m, 3H), 6.65 (s, 1H); 13C NMR (151 MHz, CDCl3) *δ* 137.6, 127.7, 126.7, 126.4, 124.8, 121.1, 112.2, 103.3, 102.5.

**5-bromo-1*H*-indole (2i)** [1]

Yield **A**: > 99%, 97.4 mg; Yield **B**: 93%, 90.7 mg. White solid, mp 85-87 °C, Rf 0.54 (Hexane/EtOAc, 10:1). 1H NMR (600 MHz, CDCl3) *δ* 8.19 (s, 1H), 7.87-7.77 (m, 1H), 7.33-7.28 (m, 2H), 7.25-7.20 (m, 1H), 6.54-6.53 (m, 1H); 13C NMR (151 MHz, CDCl3) *δ* 134.4, 129.7, 125.4, 124.9, 123.2, 113.0, 112.5, 102.3.

**2,5-dimethyl-1*H*-indole (2j)** [4]

Yield **A**: 91%, 87.5 mg; Yield **B**: > 99%, 77.0 mg. White solid, mp 118-120 °C, Rf 0.56 (Hexane/EtOAc, 10:1). 1H NMR (600 MHz, CDCl3) *δ* 7.70 (s, 1H), 7.36 (s, 1H), 7.19 (d, *J* = 8.2 Hz, 1H), 6.99 (dd, *J* = 8.2, 1.3 Hz, 1H), 6.23-6.15 (m, 1H), 2.49 (s, 3H), 2.45 (s, 3H); 13C NMR (151 MHz, CDCl3) *δ* 135.2, 134.4, 129.4, 128.8, 122.4, 119.4, 109.9, 100.0, 21.5, 13.7.

**6-chloro-1*H*-indole (2k)** [5]

Yield **A**: > 99%, 76.0 mg; Yield **B**: > 99%, 75.8 mg. White solid, mp 82-84 °C, Rf 0.60 (Hexane/EtOAc, 10:1). 1H NMR (600 MHz, CDCl3) *δ* 8.14 (s, 1H), 7.58 (d, *J* = 8.4 Hz, 1H), 7.41 (s, 1H), 7.25-7.18 (m, 1H), 7.14 (dd, *J* = 8.4, 1.8 Hz, 1H), 6.62-6.53 (m, 1H); 13C NMR (151 MHz, CDCl3) *δ* 136.2, 127.9, 126.5, 124.9, 121.6, 120.6, 111.0, 102.8.

**7-nitro-1*H*-indole (2l)** [6]

Yield **A**: 96%, 78.0 mg; Yield **B**: 98%, 79.0 mg. Yellow solid, mp 90-92 °C, Rf 0.35 (Hexane/EtOAc, 10:1). 1H NMR (600 MHz, CDCl3) *δ* 9.99 (s, 1H), 8.18 (d, *J* = 8.1 Hz, 1H), 7.99 (d, *J* = 7.7 Hz, 1H), 7.48-7.38 (m, 1H), 7.22 (t, *J* = 7.9 Hz, 1H), 6.79-6.69 (m, 1H); 13C NMR (151 MHz, CDCl3) *δ* 133.0, 131.7, 129.2, 129.0, 126.7, 119.2, 119.2, 104.0.

**3. References**

[1] Söederberg, B. C.; Shriver, J. A. *J. Org. Chem.* **1997**, *62*, 5838.

[2] Littke, A.; Soumeillant, M.; Kaltenbach III, R. F.; Cherney, R. J.; Tarby, C. M.; Kiau, S. *Org. Lett.* **2007**, *9*, 1711.

[3] Buemi, M. R.; De Luca, L.; Chimirri, A.; Ferro, S.; Gitto, R.; Alvarez-Builla, J.; Alajarin, R. *Bioorg. Med. Chem.* **2013**, *21*, 4575.

[4] Shore, G.; Morin, S.; Mallik, D.; Organ, M. G. *Chem. Eur. J.* **2008**, *14*, 1351.

[5] Tsuji, Y.; Kotachi, S.; Huh, K. T.; Watanabe, Y. *J. Org. Chem.*  **1990**, *55*, 580.

[6] Fors, B. P.; Buchwald, S. L. *J. Am. Chem. Soc.* **2009**, *131*, 12898.

**4. Copy of NMR for** **Indoles**

**1H-NMR of 2a**


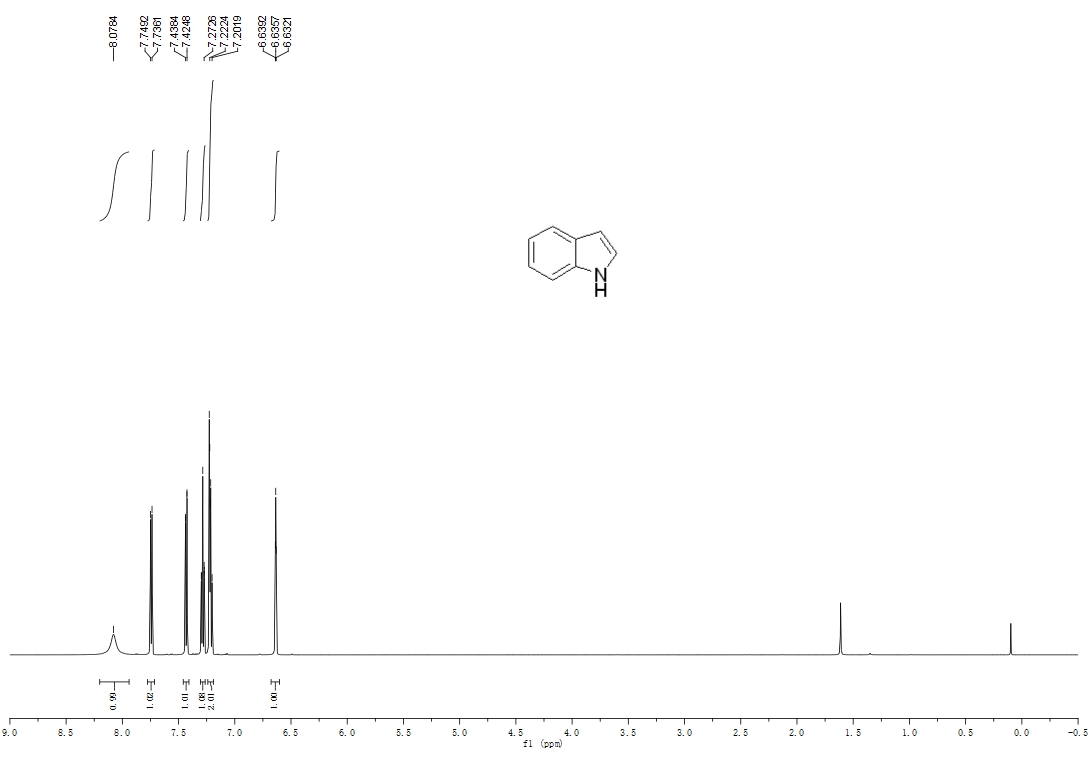


**13C-NMR of 2a**


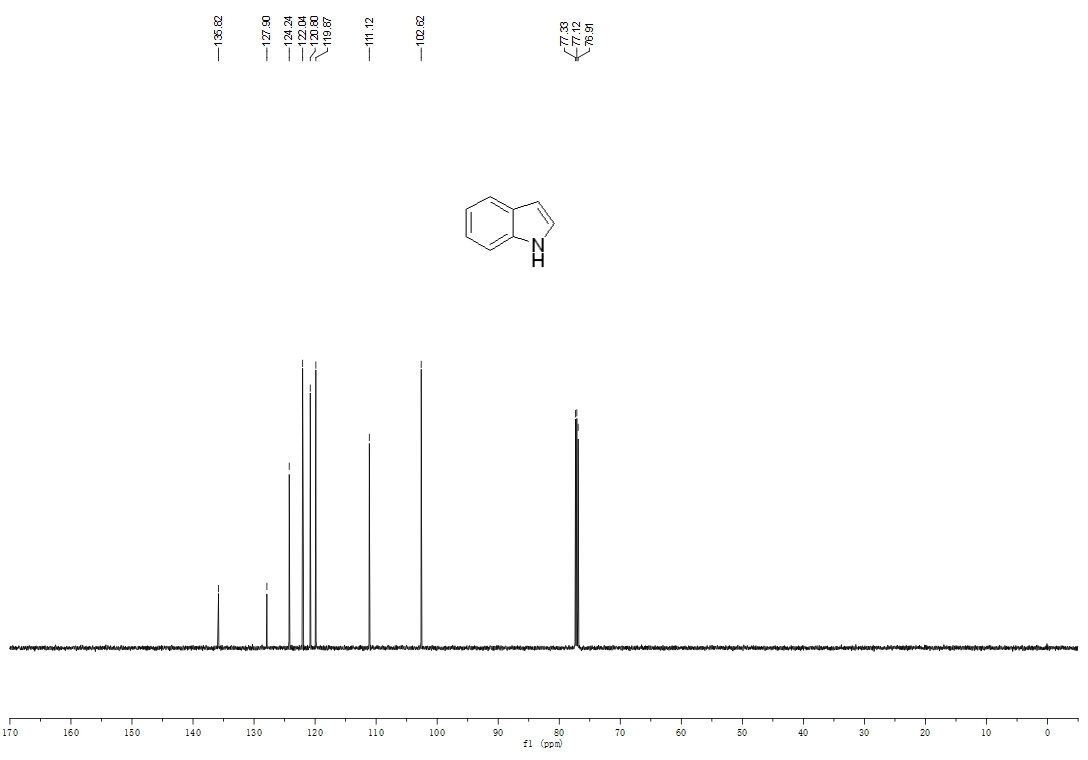


**1H-NMR of 2b**


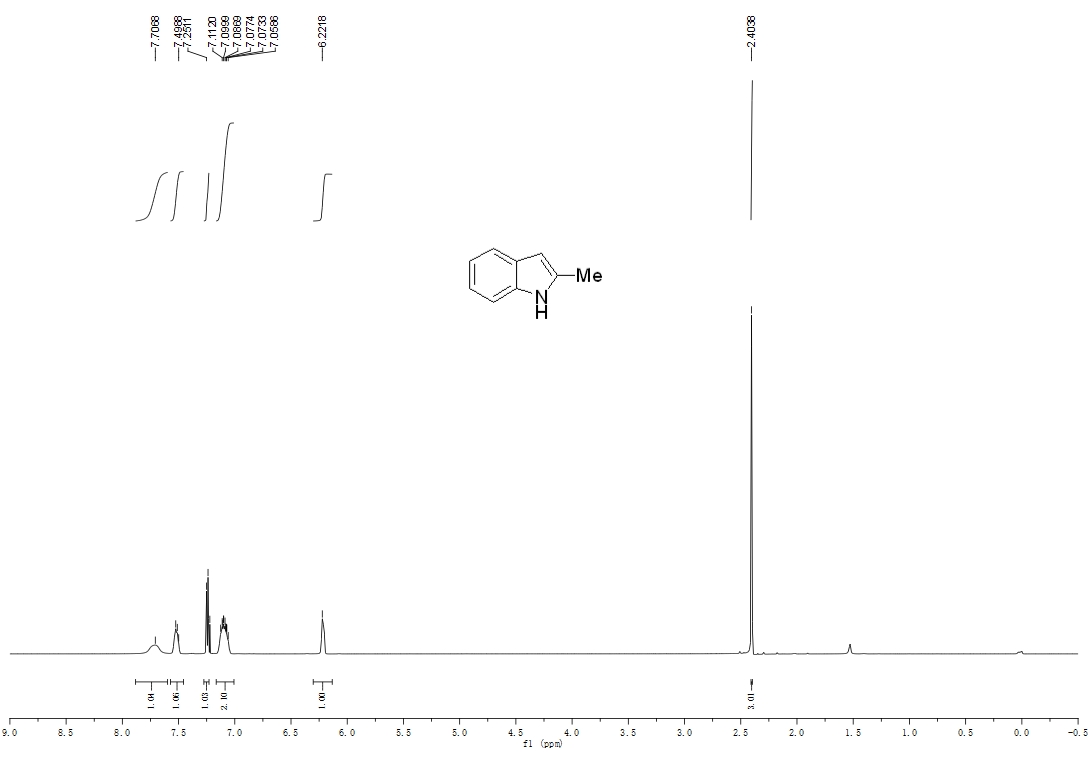


**13C-NMR of 2b**


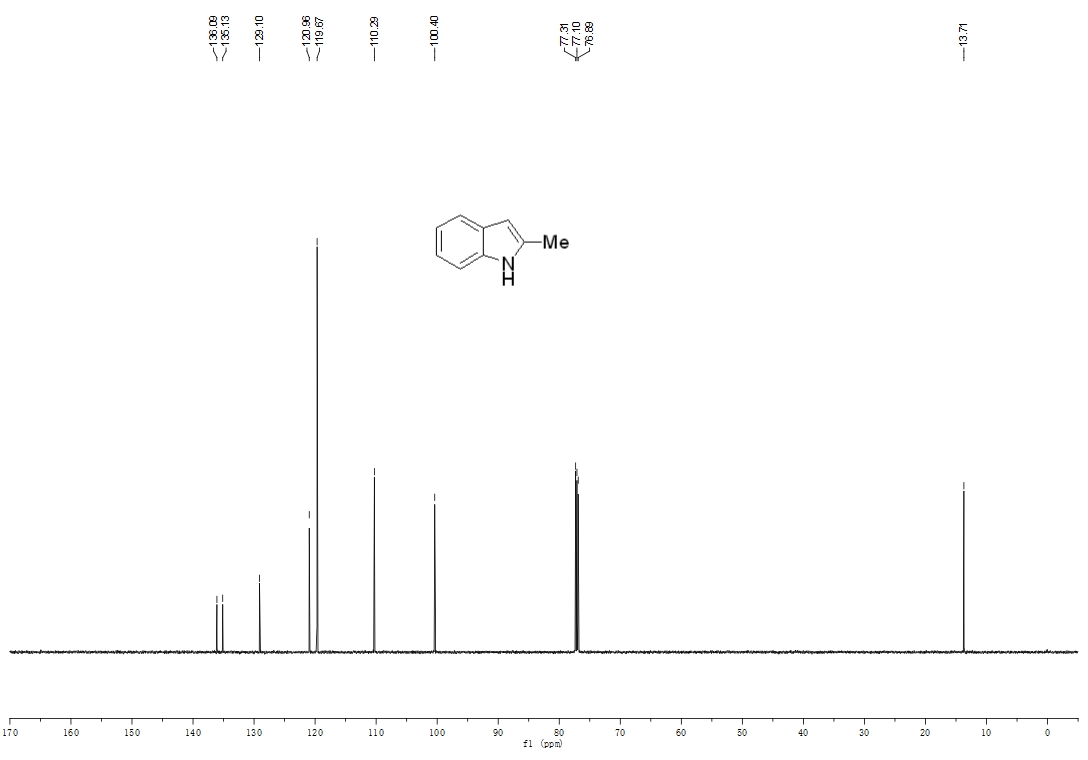


**1H-NMR of 2c**


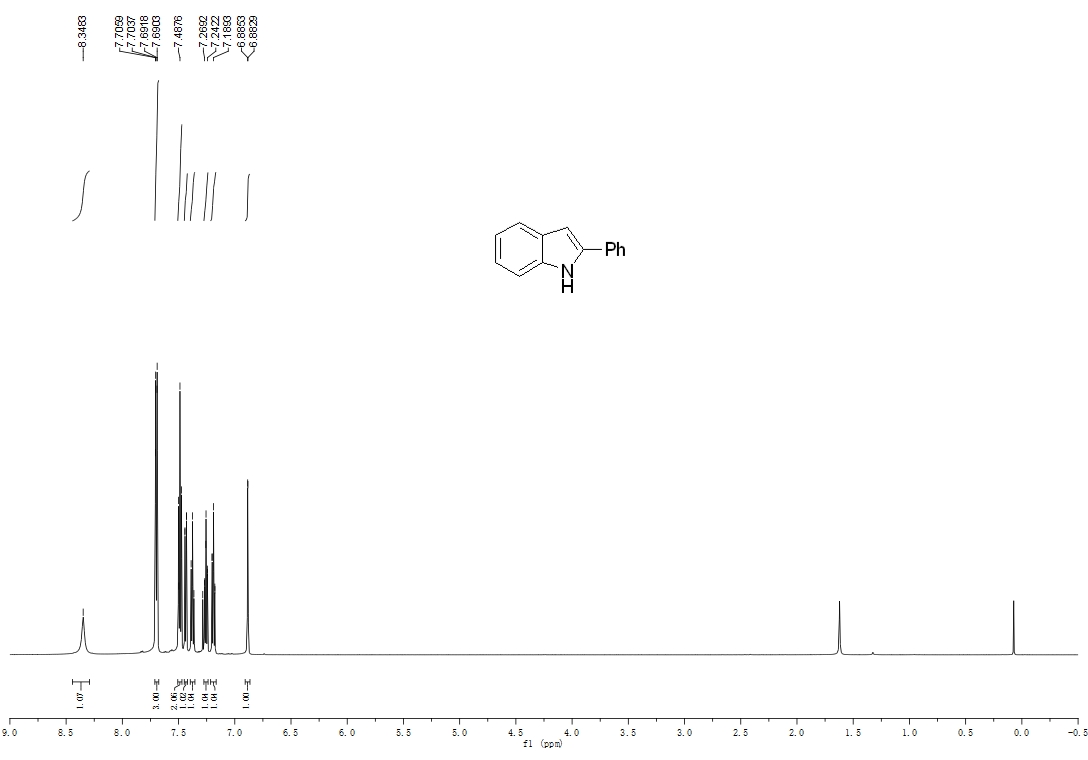


**13C-NMR of 2c**


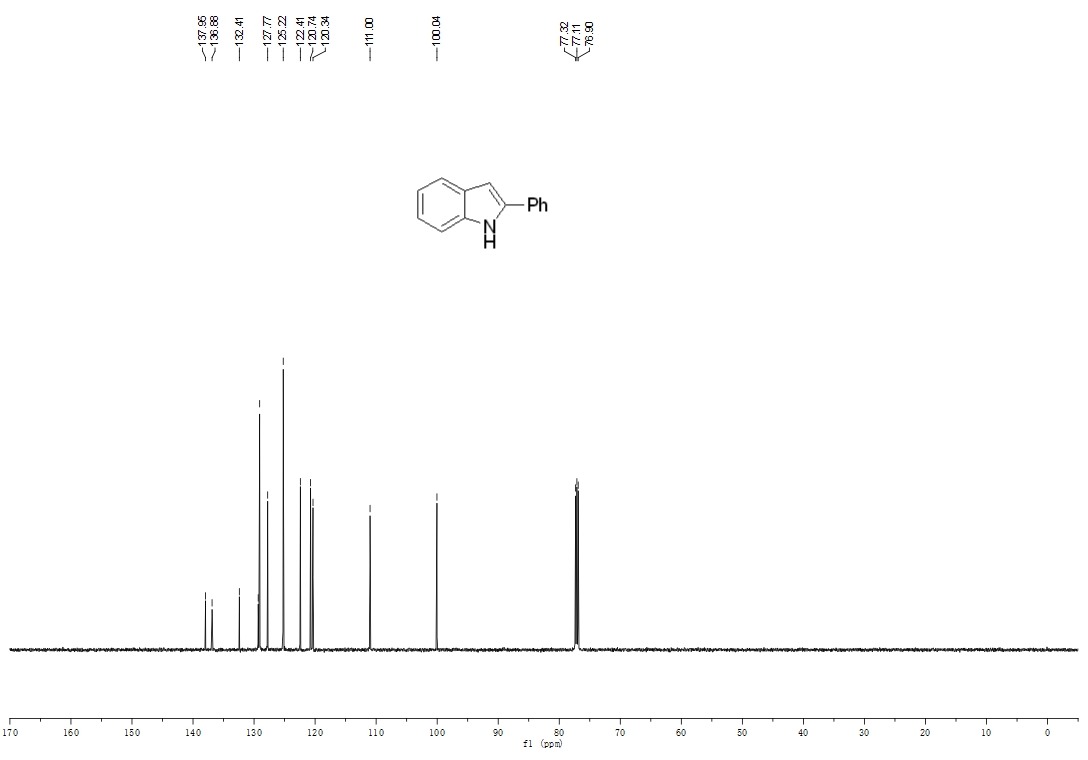


**1H-NMR of 2d**


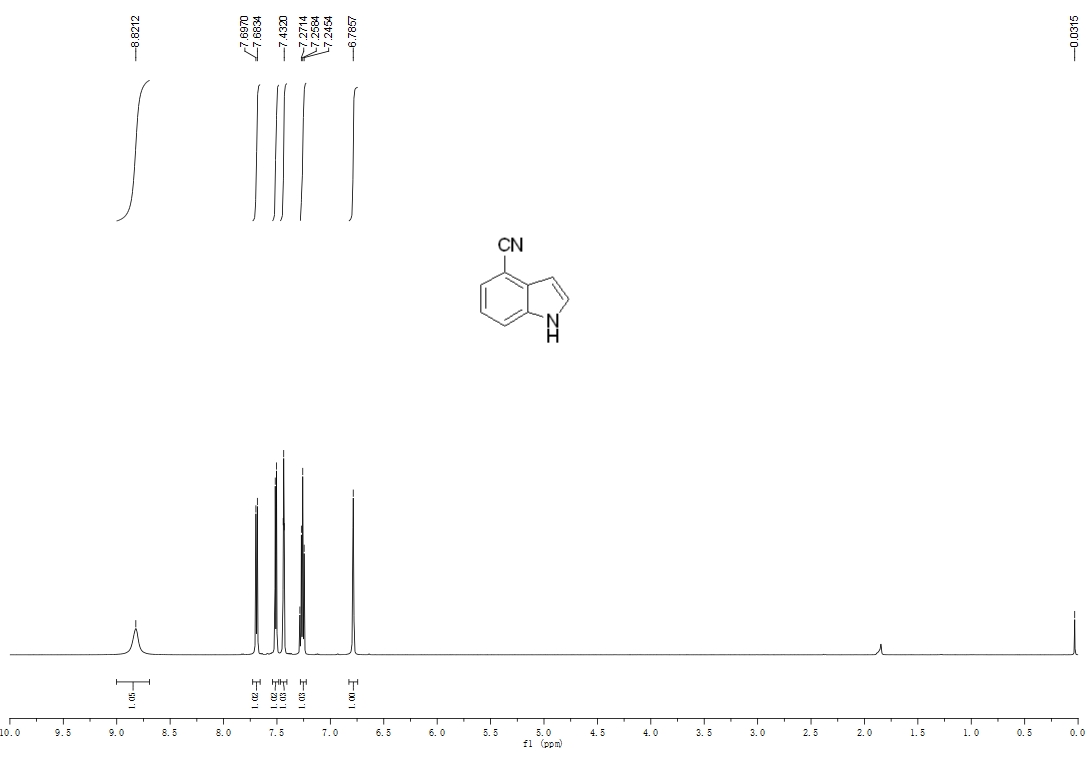


**13C-NMR of 2d**


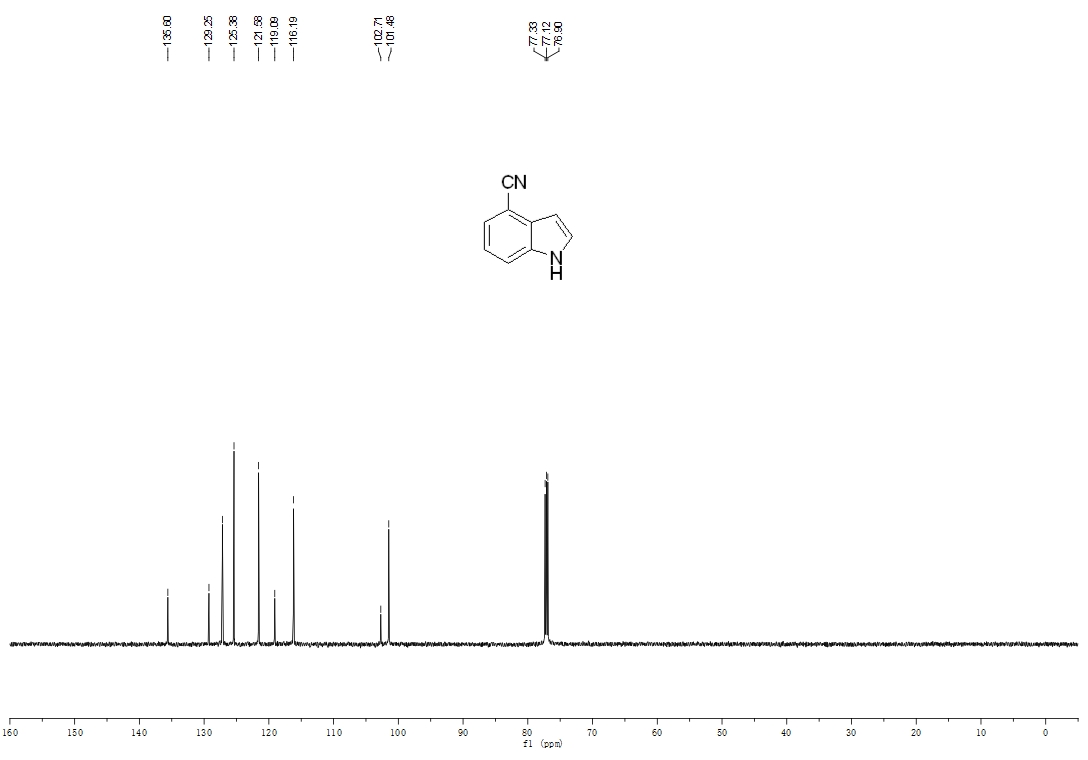


**1H-NMR of 2e**


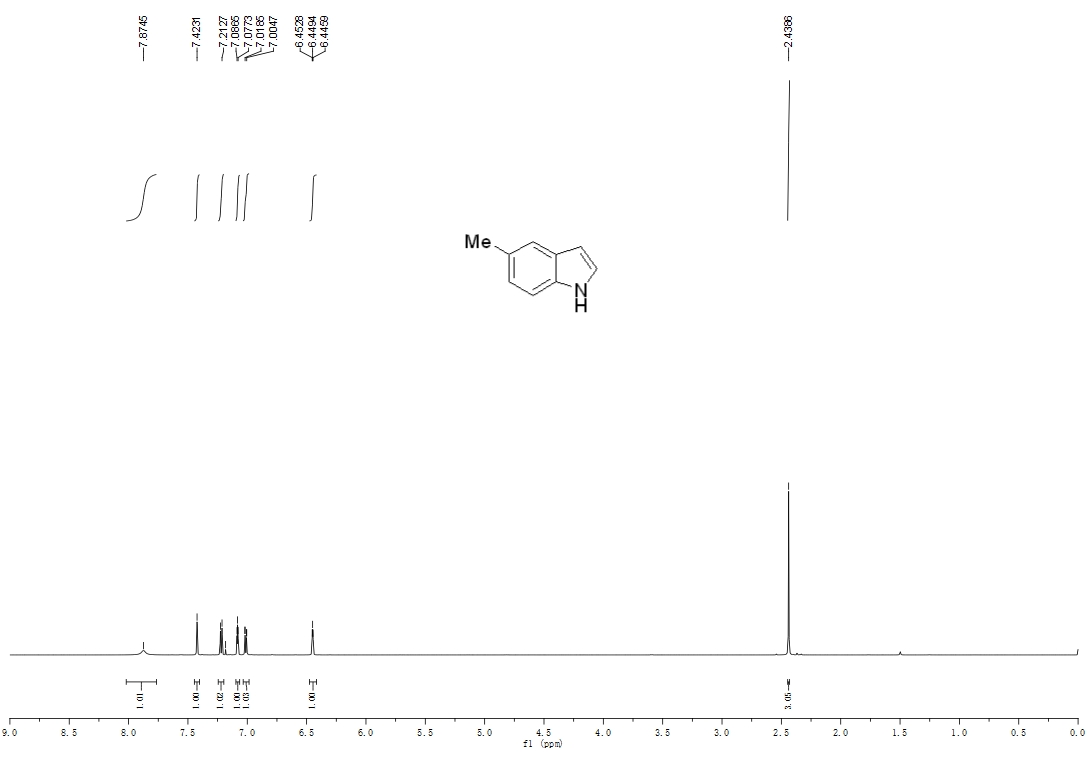


**13C-NMR of 2e**


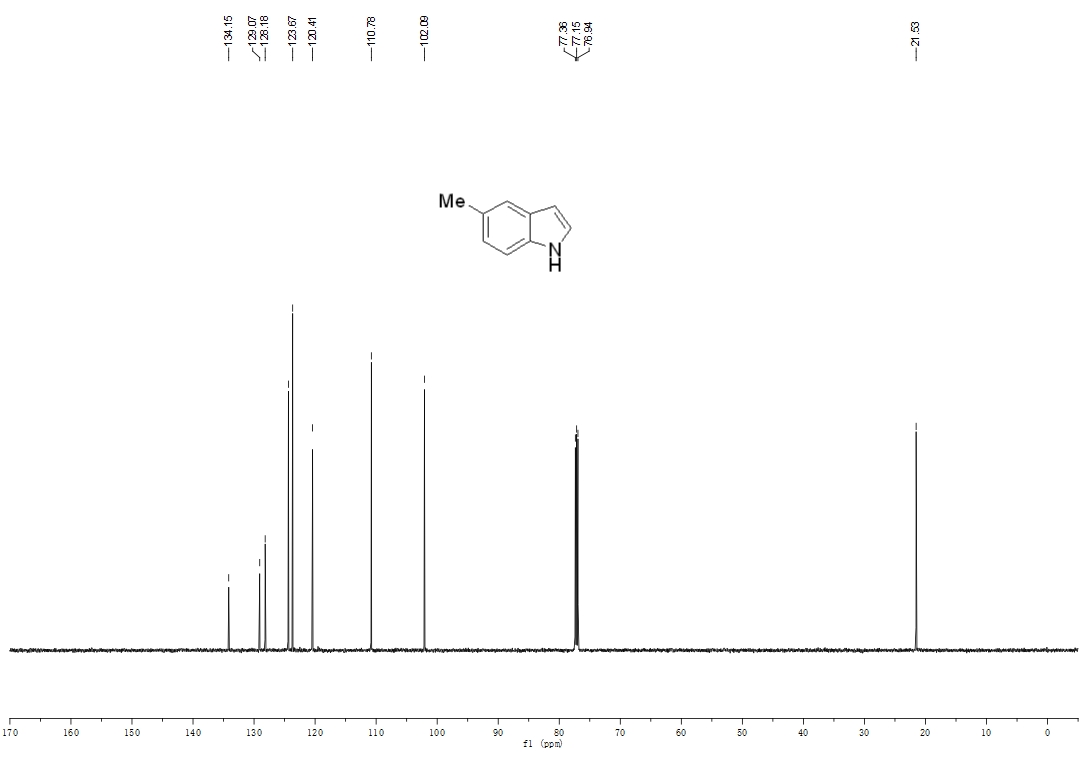


**1H-NMR of 2f**


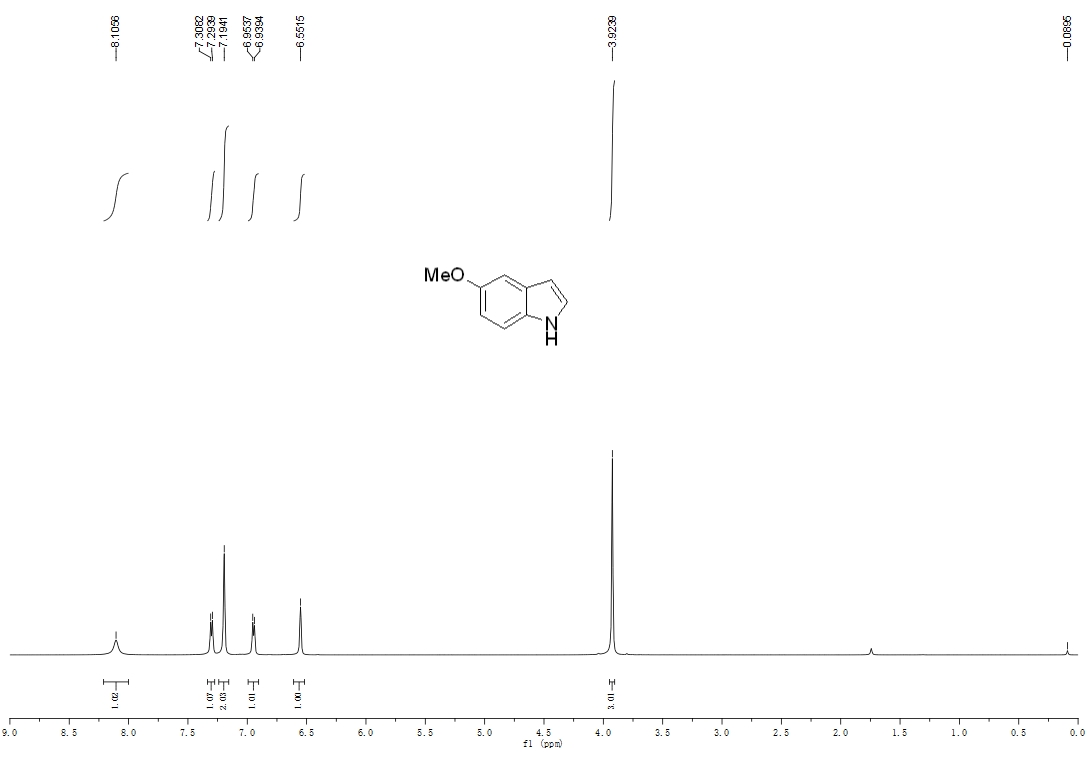


**13C-NMR of 2f**


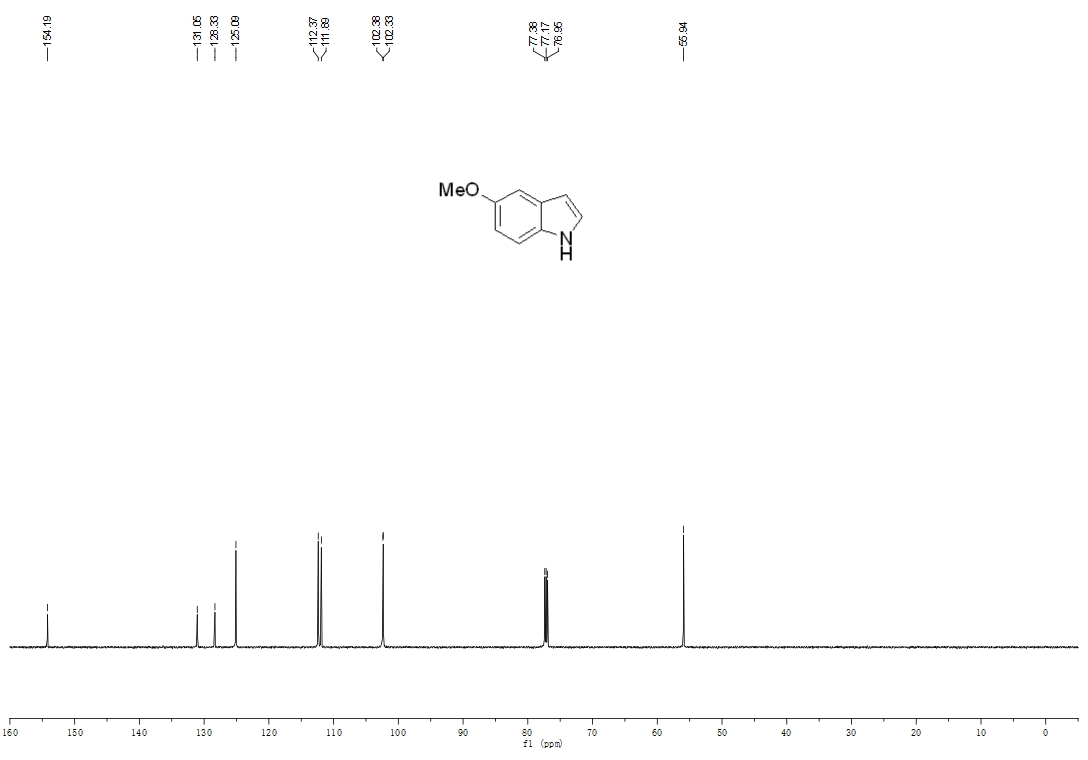


**1H-NMR of 2g**


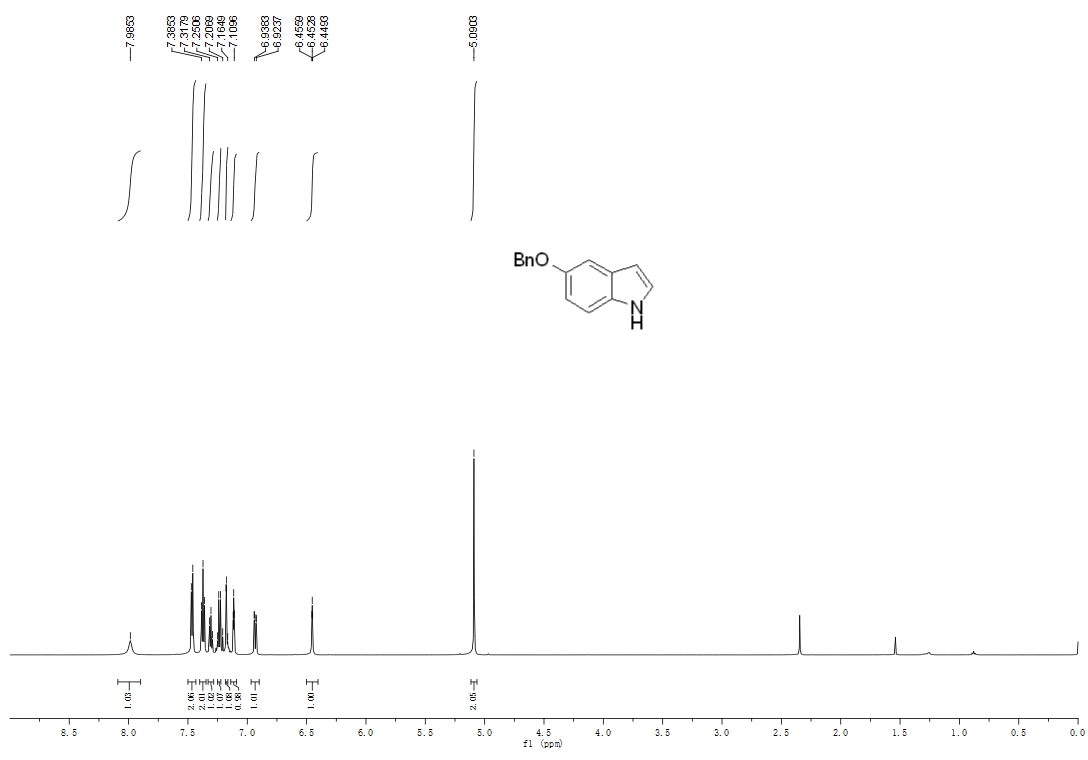


**13C-NMR of 2g**


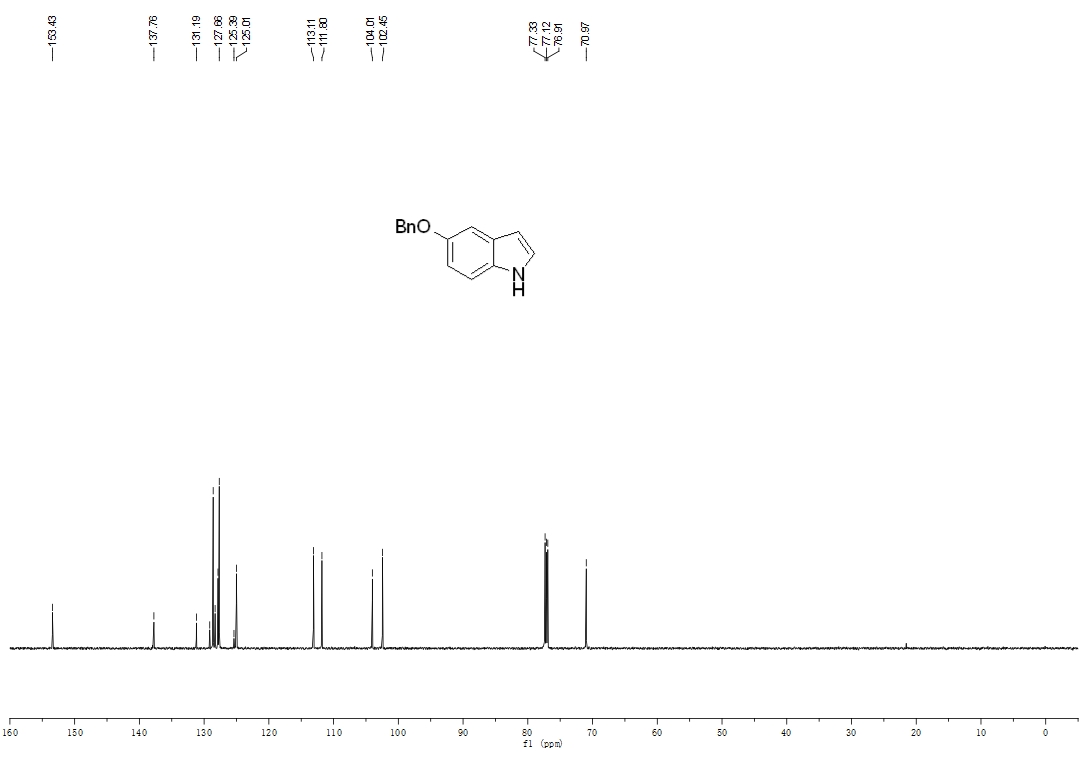


**1H-NMR of 2h**


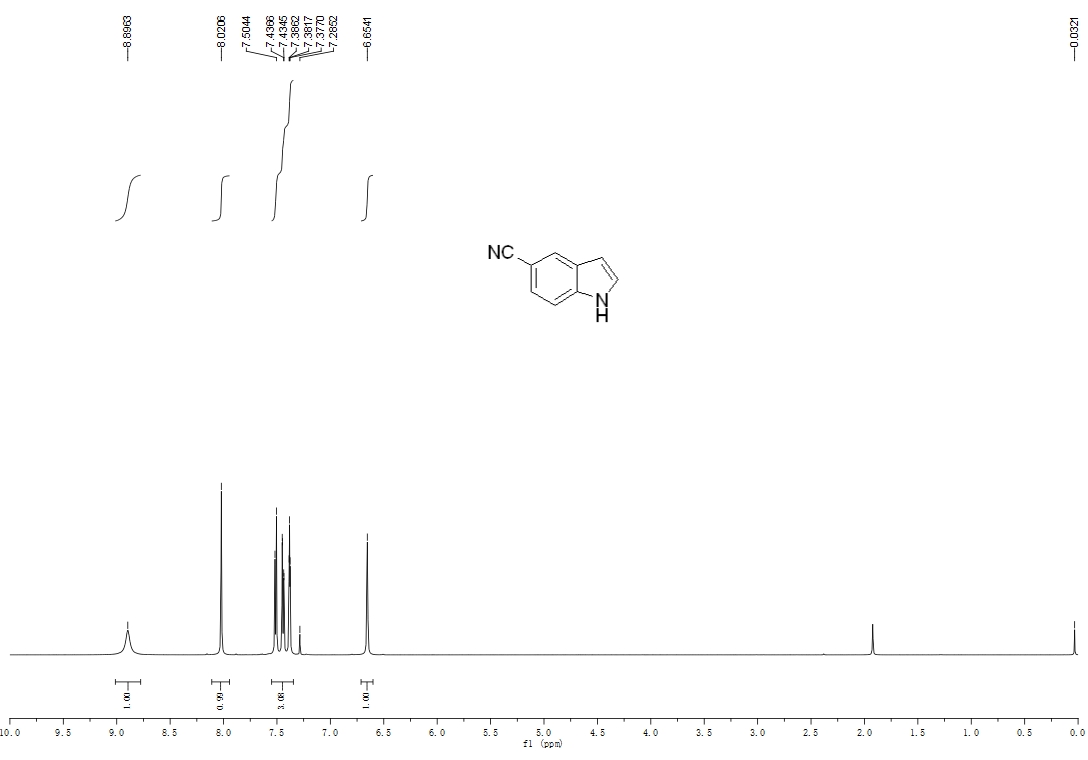


**13C-NMR of 2h**


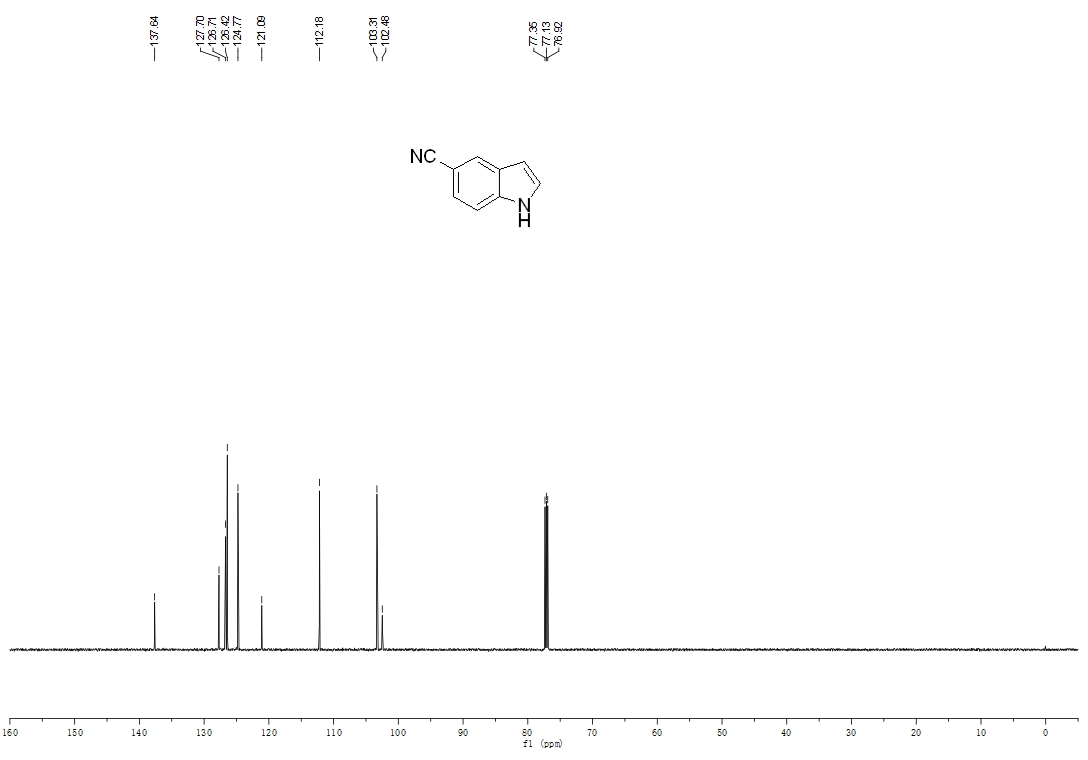


**1H-NMR of 2i**


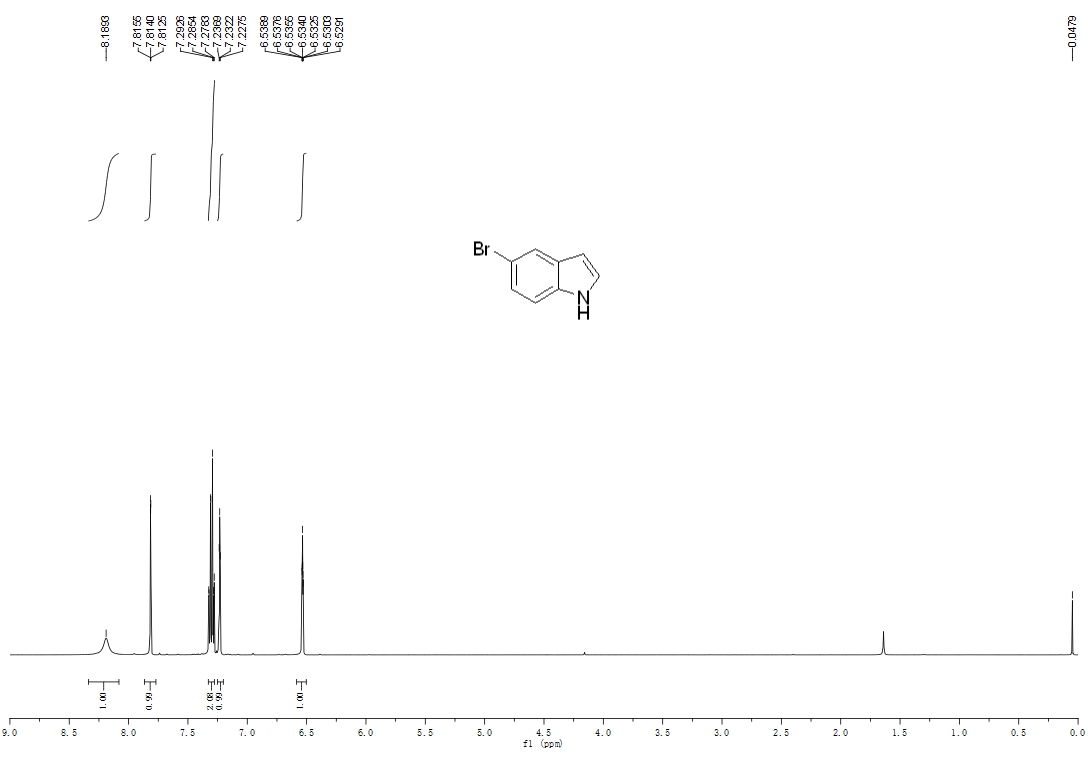


**13C-NMR of 2i**


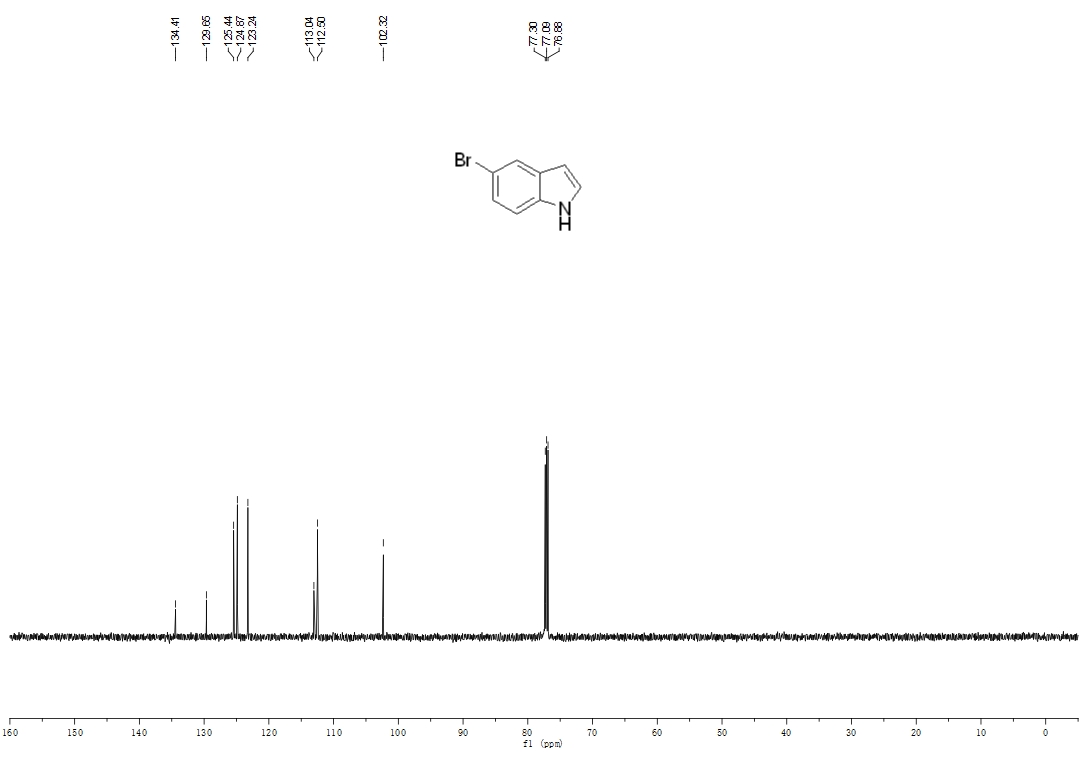


**1H-NMR of 2j**


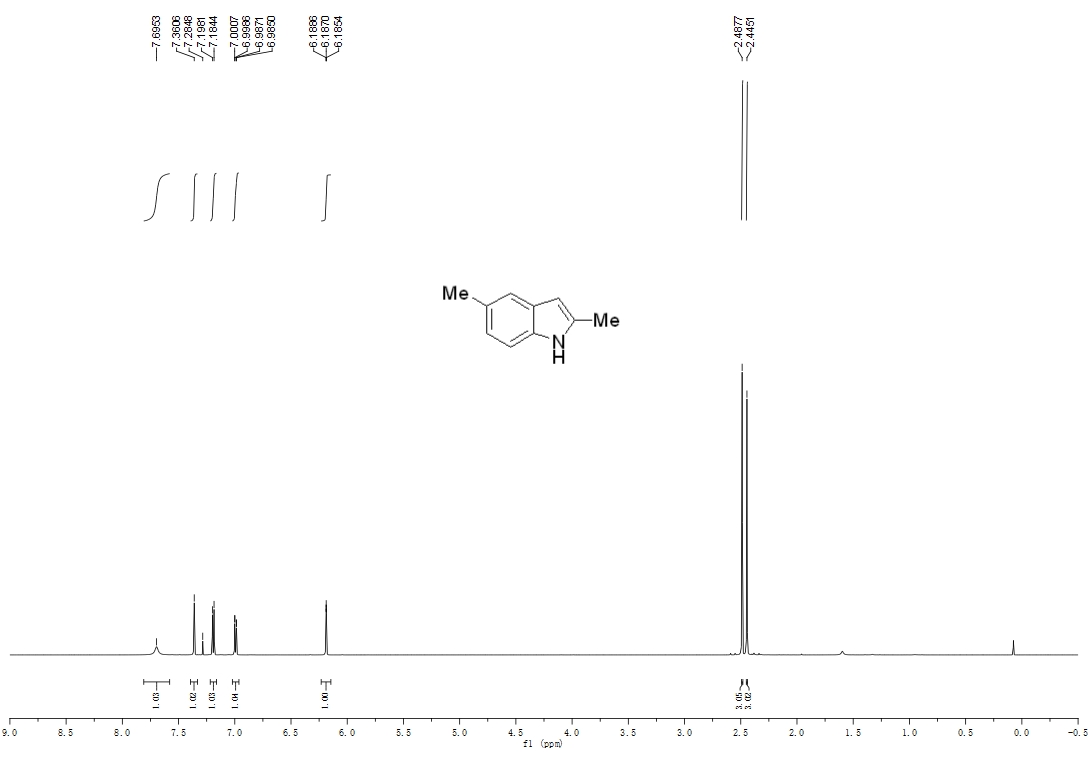


**13C-NMR of 2j**


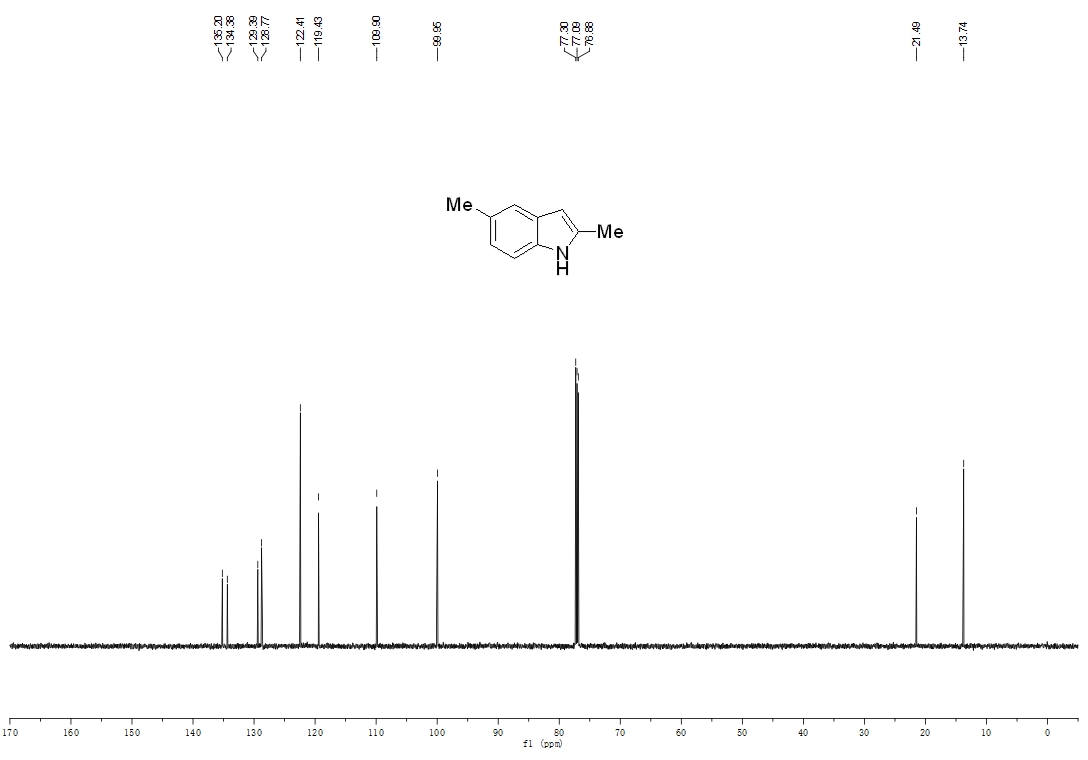


**1H-NMR of 2k**


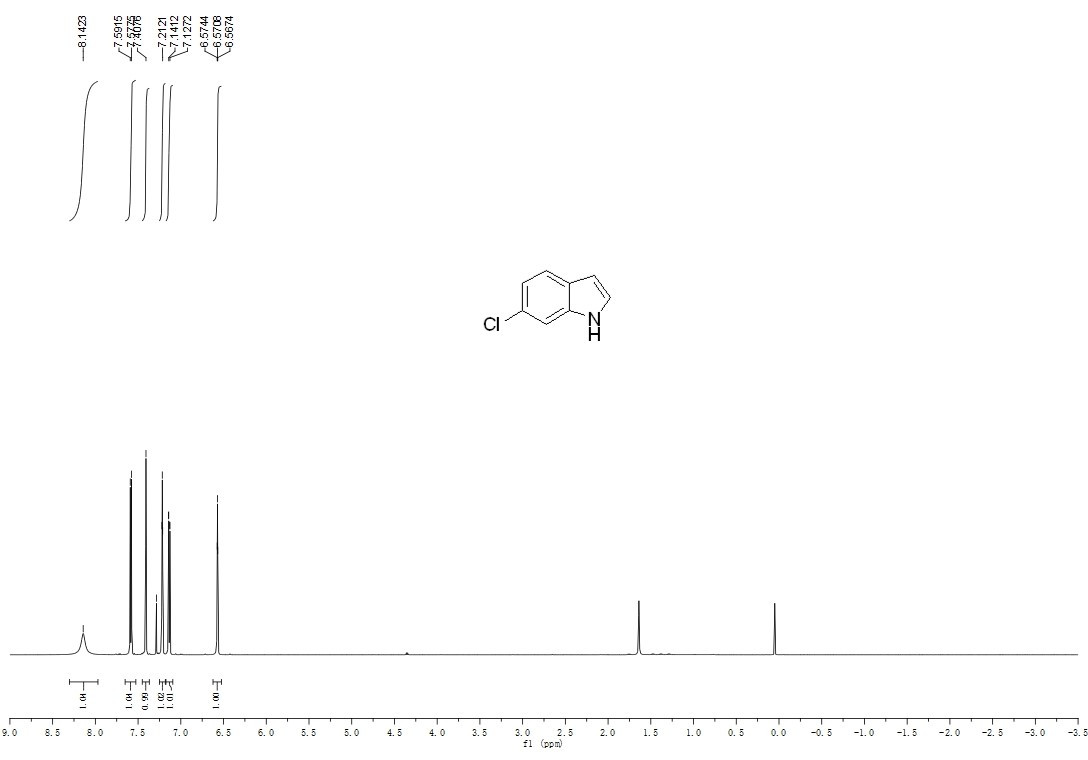


**13C-NMR of 2k**


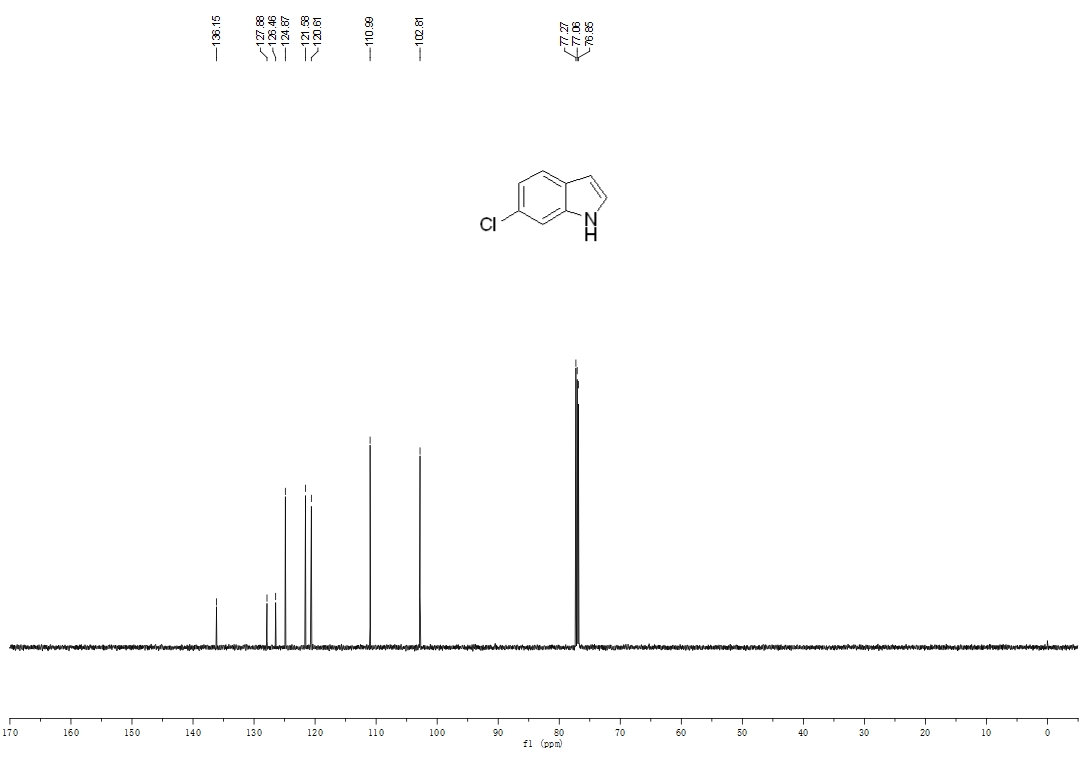


**1H-NMR of 2l**


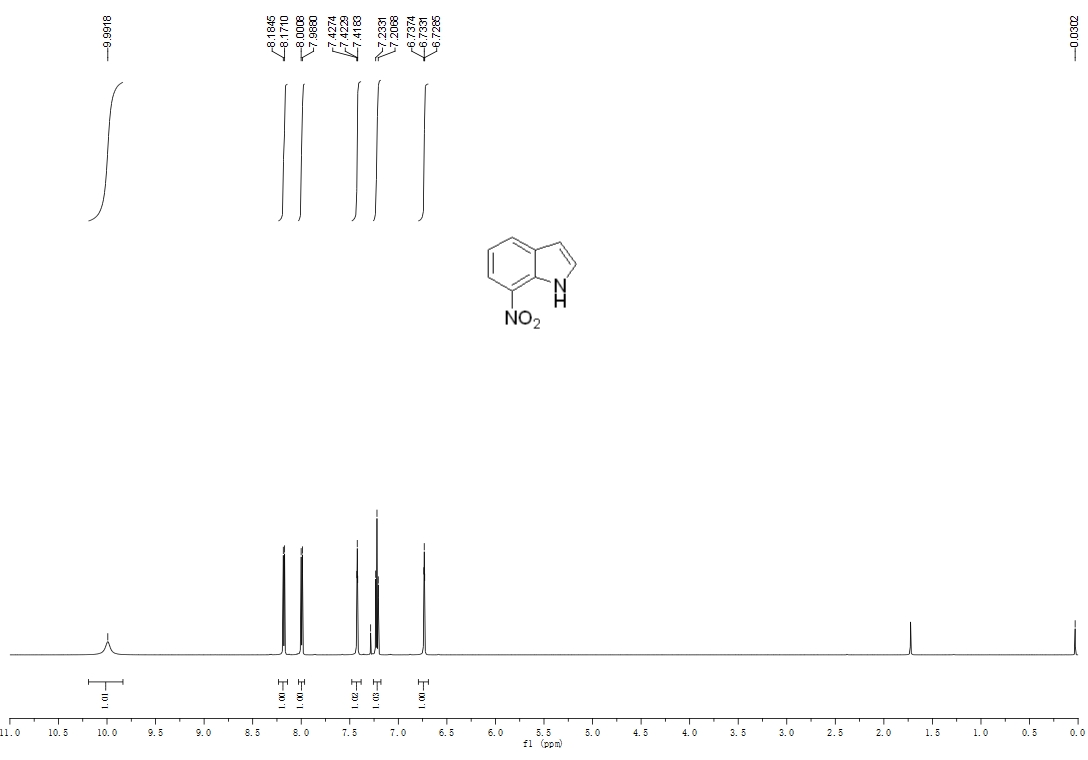


**13C-NMR of 2l**


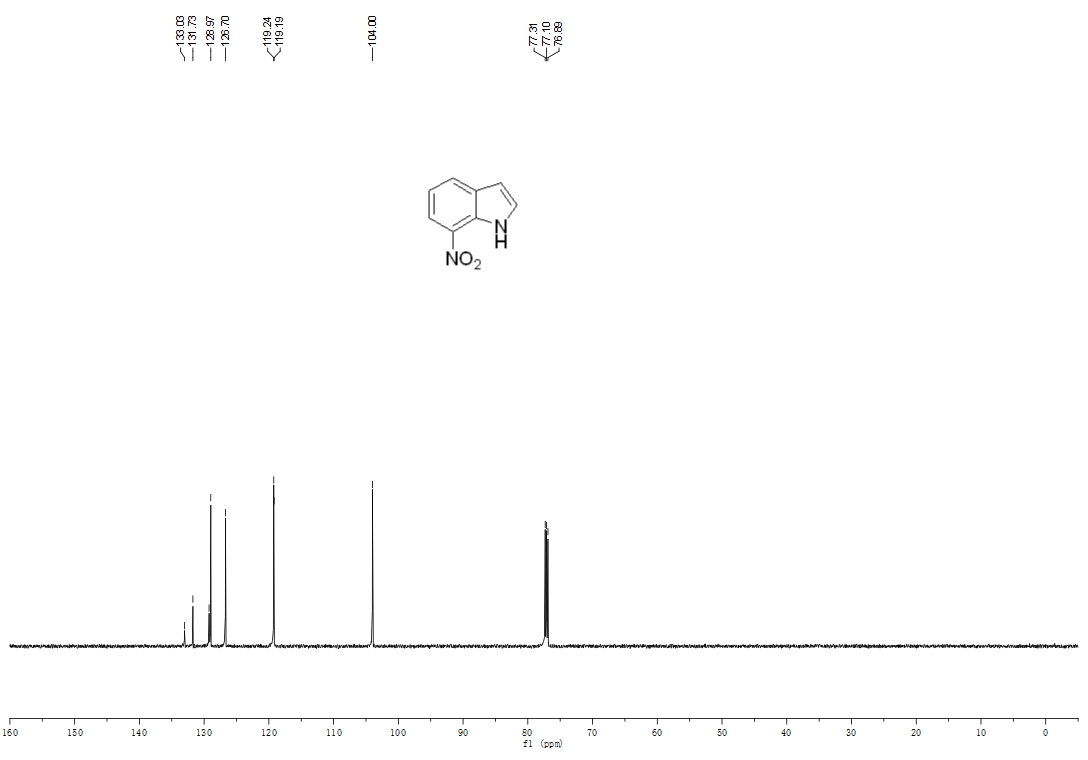

Supplement: Supplementary file 1 [file 21727614]
